# Supplementary material for: An Outbreak of Equine Herpesvirus-4 in an Ecological Donkey Milk Farm in Romania
Source: MDPI journal article supplement (doi:10.3390/vaccines10030468), 2022-03-18
Supplement: s1 [file s1]

Case Report

# An Outbreak of Equine Herpesvirus-4 in an Ecological Donkey Milk Farm in Romania

Alexandra Mureșan <sup>1,\*</sup>, Cosmin Mureșan <sup>2</sup>, Madalina Siteavu <sup>3,4</sup>, Electra Avram <sup>3</sup>, Diana Bochynska <sup>5</sup> and Marian Taulescu <sup>3,5</sup>

**Table S1.** Indirect ELISA was performed on serum samples in all surviving animals that showed URT symptoms and/or abortion and/or pyrexia. Animal demographics and data on antibody testing as well as results were interpreted. Y—years, M—months, D—days.

| Nr. | Species | Age  | Sex | Symptoms                        | Antibody titer (S/P) | Result   |
|-----|---------|------|-----|---------------------------------|----------------------|----------|
| 1.  | Donkey  | 5 Y  | F   | URT symptoms, pyrexia           | 0.486                | Positive |
| 2.  | Donkey  | 10 M | F   | URT symptoms, pyrexia           | 0.240                | Negative |
| 3.  | Donkey  | 4 Y  | F   | URT symptoms, pyrexia           | 0.200                | Negative |
| 4.  | Donkey  | 4 Y  | F   | URT symptoms, pyrexia           | 0.537                | Positive |
| 5.  | Donkey  | 7 Y  | F   | URT symptoms, pyrexia           | 0.000                | Negative |
| 6.  | Donkey  | 6 Y  | F   | Abortion, URT symptoms, pyrexia | 0.366                | Positive |
| 7.  | Donkey  | 7 D  | F   | URT symptoms, pyrexia           | 0.000                | Negative |
| 8.  | Donkey  | 5 Y  | F   | URT symptoms, pyrexia           | 0.242                | Negative |
| 9.  | Donkey  | 10 D | F   | URT symptoms, pyrexia           | 0.000                | Negative |
| 10. | Donkey  | 5 Y  | F   | URT symptoms, pyrexia           | 0.427                | Positive |
| 11. | Donkey  | 3 Y  | F   | URT symptoms, pyrexia           | 0.507                | Positive |
| 12. | Donkey  | 3 Y  | F   | URT symptoms, pyrexia           | 0.484                | Positive |
| 13. | Donkey  | 4 Y  | F   | URT symptoms, pyrexia           | 0.430                | Positive |
| 14. | Donkey  | 4 Y  | F   | URT symptoms, pyrexia           | 0.386                | Positive |
| 15. | Donkey  | 4 Y  | F   | URT symptoms, pyrexia           | 0.414                | Positive |
| 16. | Donkey  | 5 Y  | F   | Abortion, URT symptoms, pyrexia | 0.528                | Positive |
| 17. | Donkey  | 6 Y  | F   | URT symptoms, pyrexia           | 0.348                | Positive |
| 18. | Donkey  | 6 Y  | F   | URT symptoms, pyrexia           | 0.179                | Negative |
| 19. | Donkey  | 5 Y  | F   | URT symptoms, pyrexia           | 0.178                | Negative |
| 20. | Donkey  | 6 Y  | F   | Abortion, pyrexia               | 0.193                | Negative |
| 21. | Donkey  | 5 Y  | F   | URT symptoms, pyrexia           | 0.125                | Negative |
| 22. | Donkey  | 3 Y  | F   | URT symptoms, pyrexia           | 0.367                | Positive |
| 23. | Donkey  | 4 Y  | F   | URT symptoms, pyrexia           | 0.311                | Positive |
| 24. | Donkey  | 5 Y  | F   | URT symptoms, pyrexia           | 0.350                | Positive |
| 25. | Donkey  | 6 Y  | F   | URT symptoms, pyrexia           | 0.269                | Negative |
| 26. | Donkey  | 3 Y  | F   | URT symptoms, pyrexia           | 0.814                | Positive |
| 27. | Donkey  | 7 Y  | F   | URT symptoms, pyrexia           | 0.073                | Negative |
| 28. | Donkey  | 6 Y  | F   | URT symptoms, pyrexia           | 0.293                | Negative |
